# Supplementary material for: Direct formation of a 2D redox-active adlayer based on a bisterpyridine derivative and Co2+ on a Au(111) electrode
Source: Royal Society of Chemistry journal article supplement (doi:10.1039/c0cp00981d), 2010-01-01
Supplement: c0cp00981d.pdf [file c0cp00981d.pdf]

## Direct formation of a 2D redox-active adlayer based on a bisterpyridine derivative and $\text{Co}^{2+}$ on Au(111) electrode

Soichiro Yoshimoto,<sup>\*a</sup> Yuta Ono,<sup>b</sup> Katsuhiko Nishiyama<sup>b</sup> and Isao Taniguchi<sup>b</sup>

<sup>a</sup> Priority Organization for Innovation and Excellence, Kumamoto University, 2-39-1 Kurokami, Kumamoto 860-8555, Japan.

<sup>b</sup> Graduate School of Science and Technology, Kumamoto University, 2-39-1 Kurokami, Kumamoto 860-8555, Japan.

## Supplementary information (ESI)

### Experimental detail

4',4''-(1,4-Phenylene)bis(2,2':6',2''-terpyridine) (PTPy),  $\text{Co}(\text{ClO}_4)_2 \cdot x\text{H}_2\text{O}$ , and cobalt(II) 2,3,7,8,12,13,17,18-octaethyl-21*H*,23*H*-porphine (CoOEP) were purchased from Aldrich and used without further purification.  $\text{HClO}_4$  (Cica-Merck, ultrapure grade) and ethanol (99.5 %) were obtained from Kanto Chemical Co. Each saturated solution for  $\text{Co}(\text{ClO}_4)_2$  and PTPy was prepared in ethanol. The 1 : 1 mixed solution of PTPy and  $\text{Co}^{2+}$  was prepared by adding ethanolic solution saturated with  $\text{Co}(\text{ClO}_4)_2$  into a PTPy-saturated ethanolic solution. CoOEP was dissolved in benzene.

Au(111) single-crystal electrodes were prepared as described in a previous paper.<sup>18,19</sup> The Au(111) substrates were annealed in hydrogen flame and, after cooling to room temperature, were transferred into either PTPy-saturated ethanolic solution or 1 : 1 mixed ethanolic solution of  $\text{Co}(\text{ClO}_4)_2$  and PTPy. The modification time was between 10 s and 60 s. CoOEP-modified Au(111) electrode was prepared by immersing into *ca.* 100  $\mu\text{M}$  CoOEP benzene solution for 10 s. The modified Au(111) substrates were then dried and transferred into either an electrochemical cell filled with 0.1 M  $\text{HClO}_4$  or an electrochemical STM cell. Cyclic voltammetry was carried out under either an Ar or a pure  $\text{O}_2$  stream.

Electrochemical STM measurements were performed in 0.1 M  $\text{HClO}_4$  using a Nanoscope E system (Digital Instruments, Santa Barbara) with a tungsten tip etched in 1 M KOH. To minimize residual faradaic current, the tips were coated with nail polish or polyethylene. STM images were obtained in constant-current mode with a high-resolution scanner (HD-0.5I). All potential values (both substrate and tip) are referenced to the reversible hydrogen electrode (RHE). XPS measurement was carried out by Sigma probe (ThermoFisher Scientific Co.).
